# Supplementary material for: Genome-Wide Association Study to Identify Marker–Trait Associations for Seed Color in Colored Wheat (Triticum aestivum L.)
Source: MDPI journal article supplement (doi:10.3390/ijms25073600), 2024-03-22
Supplement: s1 [file s1]

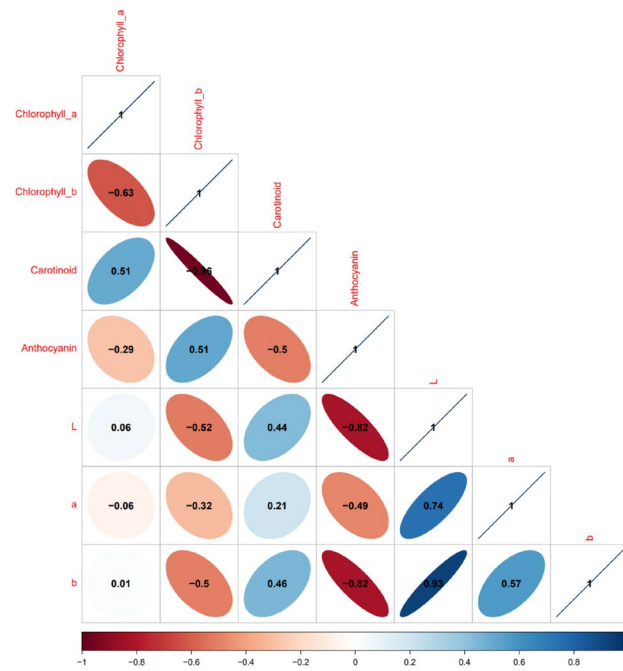

**Figure S1.** Pearson's correlation coefficients among the phenotypic traits are depicted, highlighting their interrelationships.
