# Supplementary material for: Genome-Wide Association Study to Identify Marker–Trait Associations for Seed Color in Colored Wheat (Triticum aestivum L.)
Source: Int J Mol Sci. 2024 Mar 22;25(7):3600. doi: 10.3390/ijms25073600 (PMC11011601; doi:10.3390/ijms25073600)
Supplement: Supplementary file 1 [file ijms-25-03600-s001.zip › Table S1.xlsx]

## Sheet: Sheet1
Supplementary Table S1. The details of the primers used in this study
Gene	Description	Forward primer	Reverse primer
Anthocyanin regulatory R-S protein	TraesCS2A02G409600	AGCTCGCTGCTGCTGTGAGG	AGACTCGTAGAGCTCCCGCA
MYB transcription factor	TraesCS2A02G552400	GGACATCAAGAGGGGCAAGT	GCTGCTGTGCGCATCCTGGA
bHLH transcription factor	TraesCS2A02G409400	CATGCCAGGAAGAGCCCACC	AGCTGGTCGGCGGTGATGTC
Cinnamoyl-CoA reductase	TraesCS4B02G071000	ATGTTCCCAATGTTTCCACC	GCGACGTACTGGGCGTTCCT
Cinnamyl alcohol dehydrogenase_TraesCS4B02G07100	TraesCS4B02G07100	ATGGCGCCTACGGCAACGAC	TAGATGGCGTTCCTCCAGTC
F-box protein	TraesCS2A02G551700	GAGCATGGCAGGTCCGACGAG	GCCGGTGACAGGGTTGCAGAT
