# Supplementary material for: Genome-Wide Association Study to Identify Marker–Trait Associations for Seed Color in Colored Wheat (Triticum aestivum L.)
Source: Int J Mol Sci. 2024 Mar 22;25(7):3600. doi: 10.3390/ijms25073600 (PMC11011601; doi:10.3390/ijms25073600)
Supplement: Supplementary file 1 [file ijms-25-03600-s001.zip › Table S2.xlsx]

## Sheet: Sheet1
Supplementary Table S2. Essential summary statistics, including range, mean, and coefficient of variance.
Trait	Range	Mean±SE	CV(%)
Chlorophyll_a	11.05-50.07	29.87±0.71	29.5614
Chlorophyll_b	0.18-66.03	16.11±0.77	59.2179
Carotenoid	0.26-19.05	8.19±0.34	51.7705
Anthocyanin	0.01-0.85	0.31±0.01	54.8387
L	24.97-69.74	51.08±0.34	8.24197
a	0.24-13.26	5.41±0.09	21.4418
b	1.47-16.97	11.18±0.23	25.7603
