# Supplementary material for: Genome-Wide Association Study to Identify Marker–Trait Associations for Seed Color in Colored Wheat (Triticum aestivum L.)
Source: Int J Mol Sci. 2024 Mar 22;25(7):3600. doi: 10.3390/ijms25073600 (PMC11011601; doi:10.3390/ijms25073600)
Supplement: Supplementary file 1 [file ijms-25-03600-s001.zip › Table S3.xlsx]

## Sheet: Sheet1
Supplementary Table S3. Marker distribution detected by GWAS.
Chromosome Genome	1	2	3	4	5	6	7	Total (No.)
A	591	653	256	239	254	235	274	2502
B	283	315	179	80	168	132	92	1249
D	66	39	25	24	11	33	20	218
Total	941	1009	463	347	438	406	393	3969
