# Supplementary material for: Genome-Wide Association Study to Identify Marker–Trait Associations for Seed Color in Colored Wheat (Triticum aestivum L.)
Source: Int J Mol Sci. 2024 Mar 22;25(7):3600. doi: 10.3390/ijms25073600 (PMC11011601; doi:10.3390/ijms25073600)
Supplement: Supplementary file 1 [file ijms-25-03600-s001.zip › Table S4.xlsx]

## Sheet: Sheet1
Supplementary Table S4 Potential candidate gene located in 250 kb upstream and downstream of the SNP loci associated with seed color.
gene	Annotation	e-value	Similarity(%)	Species
TraesCS2A02G409600	Anthocyanin regulatory R-S protein_MYC protein	0	88.71	Triticum urartu
TraesCS2A02G409400	bHLH transcription factor	0	100	Triticum aestivum
TraesCS2A02G532800	diacylglycerol kinase 5-like	0	98.189	Aegilops tauschii subsp. tauschii
TraesCS2A02G435800	FBD-associated F-box protein At5g50270	0	96.739	Aegilops tauschii subsp. tauschii
TraesCS2A02G551700	F-box protein At5g65850-like	5e-93	52.679	Aegilops tauschii subsp. tauschii
TraesCS2A02G436300	leucine-rich repeat extensin-like protein 3	2e-107	94.944	Brachypodium distachyon<>hypothetical protein BRADI_4g07580v3
TraesCS2A02G552400	myb-related protein 308-like	0	90.935	Aegilops tauschii subsp. tauschii<>MYB transcription factor 77
TraesCS2A02G436200	pectin acetylesterase 7-like	0	98.219	Aegilops tauschii subsp. tauschii
TraesCS4B02G070600	predicted protein	8e-30	89.286	Hordeum vulgare subsp. vulgare
TraesCS4B02G070800	probable E3 ubiquitin-protein ligase ARI1	0	93.878	Aegilops tauschii subsp. tauschii
TraesCS2A02G424100	putative F-box protein At4g22660	8e-167	56.034	Aegilops tauschii subsp. tauschii
TraesCS2A02G436800	serine/threonine-protein kinase minibrain-like	0	96.878	Aegilops tauschii subsp. tauschii
TraesCS2A02G551900	ubiquinone biosynthesis protein COQ4 homolog, mitochondrial	9e-168	97.807	Aegilops tauschii subsp. tauschii<>unnamed protein product
TraesCS2B02G480800	unnamed protein product	3e-105	83.333	Triticum aestivum
TraesCS2A02G551200	uracil-DNA glycosylase, mitochondrial	0	96.474	Aegilops tauschii subsp. tauschii
TraesCS2A02G424200	WD repeat protein	0	100	Triticum aestivum
TraesCS2A02G533000	G-type lectin S-receptor-like serine/threonine-protein kinase At1g11410	0	96.825	Aegilops tauschii subsp. tauschii
TraesCS2A02G533200	probable indole-3-pyruvate monooxygenase YUCCA5	0	98.077	Aegilops tauschii subsp. tauschii
TraesCS2A02G532900	scarecrow-like protein 3	0	94.419	Aegilops tauschii subsp. tauschii
TraesCS2A02G532700	uncharacterized protein LOC109771612	6e-41	90.476	Aegilops tauschii subsp. tauschii
TraesCS2A02G532500	unnamed protein product	1e-31	91.667	Triticum aestivum
TraesCS2A02G533100	unnamed protein product	0	79.511	Triticum aestivum
TraesCS2A02G533300	unknown protein	1e-31	67.778	Oryza sativa Japonica Group<>Os01g0357000
TraesCS2A02G532600	G-type lectin S-receptor-like serine/threonine-protein kinase At4g27290	0	91.667	Aegilops tauschii subsp. tauschii
TraesCS2B02G480700	expansin-B9-like	0	95.849	Aegilops tauschii subsp. tauschii<>unnamed protein product
TraesCS2B02G480900	unnamed protein product	3e-108	94.231	Triticum aestivum
TraesCS2A02G279400	unnamed protein product	0	96.024	Triticum aestivum
TraesCS2A02G279300	protein XRI1-like	0	98.73	Aegilops tauschii subsp. tauschii
TraesCS2A02G424300	uncharacterized protein LOC109780601	2e-73	100	Aegilops tauschii subsp. tauschii
TraesCS2A02G424500	unnamed protein product	0	97.647	Triticum aestivum
TraesCS2A02G424861	proline-rich protein	1e-160	99.187	Triticum aestivum
TraesCS2A02G424800	36.4 kDa proline-rich protein-like	1e-99	96.341	Aegilops tauschii subsp. tauschii
TraesCS2A02G424400	pentatricopeptide repeat-containing protein At1g79490, mitochondrial	0	98.582	Aegilops tauschii subsp. tauschii
TraesCS2A02G424700	predicted protein	0	100	Hordeum vulgare subsp. vulgare
TraesCS2A02G424600	cinnamyl alcohol dehydrogenase 7-like	0	97.29	Aegilops tauschii subsp. tauschii
TraesCS4B02G070900	probable U3 small nucleolar RNA-associated protein 7	0	97.552	Aegilops tauschii subsp. tauschii<>probable U3 small nucleolar RNA-associated protein 7
TraesCS4B02G071000	probable CCR4-associated factor 1 homolog 11	5e-179	88.811	Aegilops tauschii subsp. tauschii
TraesCS4B02G070500	type IV inositol polyphosphate 5-phosphatase 11 isoform X1	0	97.626	Aegilops tauschii subsp. tauschii
TraesCS4B02G070700	DIMBOA UDP-glucosyltransferase BX9-like	0	94.839	Aegilops tauschii subsp. tauschii
TraesCS4B02G070400	uncharacterized protein LOC109767317	0	92.986	Aegilops tauschii subsp. tauschii
TraesCS2A02G551500	unnamed protein product	8e-43	79.339	Triticum aestivum
TraesCS2A02G552900	hypothetical protein TRIUR3_01092	0	97.043	Triticum urartu
TraesCS2A02G551600	predicted protein	1e-136	87.879	Hordeum vulgare subsp. vulgare
TraesCS2A02G553000	hypothetical protein TRIUR3_01091	3e-88	97.692	Triticum urartu
TraesCS2A02G552300	uncharacterized protein LOC109746554	0	95.095	Aegilops tauschii subsp. tauschii<>uncharacterized protein LOC109746554
TraesCS2A02G551300	Early nodulin-like protein 1	7e-116	100	Triticum urartu
TraesCS2A02G551800	small glutamine-rich tetratricopeptide repeat-containing protein 2	7e-142	95.982	Aegilops tauschii subsp. tauschii
TraesCS2A02G551400	pentatricopeptide repeat-containing protein At1g18485-like	0	98.462	Aegilops tauschii subsp. tauschii
TraesCS2A02G553100	hypothetical protein TRIUR3_01092	8e-126	72.659	Triticum urartu
TraesCS2A02G553200	uncharacterized protein LOC109775405	0	83.171	Aegilops tauschii subsp. tauschii
TraesCS2A02G552800	DEAD-box ATP-dependent RNA helicase 34 isoform X1	0	98.916	Aegilops tauschii subsp. tauschii
TraesCS2A02G552700	unnamed protein product	0	95.341	Triticum aestivum
TraesCS2A02G552200	pyruvate decarboxylase 2-like	0	79.954	Aegilops tauschii subsp. tauschii
TraesCS2A02G552100	pentatricopeptide repeat-containing protein At4g01990, mitochondrial-like	0	96.262	Aegilops tauschii subsp. tauschii<>unnamed protein product
TraesCS2A02G552000	vacuolar protein sorting-associated protein 41 homolog	0	98.945	Aegilops tauschii subsp. tauschii<>unnamed protein product
TraesCS2A02G552500	unnamed protein product	1e-42	85.393	Triticum aestivum
TraesCS2A02G552600	hypothetical protein TRIUR3_01096	0	99.029	Triticum urartu
TraesCS2A02G436400	unnamed protein product	0	91.512	Triticum aestivum
TraesCS2A02G436900	probable protein-S-isoprenylcysteine O-methyltransferase	5e-162	97.357	Aegilops tauschii subsp. tauschii
TraesCS2A02G436700	alkylated DNA repair protein alkB homolog 8	0	96.552	Aegilops tauschii subsp. tauschii
TraesCS2A02G436000	trihelix transcription factor GT-3a-like	4e-63	99	Aegilops tauschii subsp. tauschii<>unnamed protein product
TraesCS2A02G435700	uncharacterized protein LOC109748766	7e-122	85.778	Aegilops tauschii subsp. tauschii
TraesCS2A02G436600	predicted protein	0	95.88	Hordeum vulgare subsp. vulgare<>predicted protein
TraesCS2A02G436100	maltose excess protein 1-like, chloroplastic	0	95.782	Aegilops tauschii subsp. tauschii
TraesCS2A02G435900	unnamed protein product	0	94.325	Triticum aestivum
TraesCS2A02G436500	unnamed protein product	0	94.556	Triticum aestivum
TraesCS2A02G409500	1,2-dihydroxy-3-keto-5-methylthiopentene dioxygenase 4-like	3e-120	92.09	Aegilops tauschii subsp. tauschii
TraesCS2A02G409300	uncharacterized protein LOC109734916	0	92.517	Aegilops tauschii subsp. tauschii
TraesCS2A02G409700	Uncharacterized protein YhcW	0	99.403	Triticum urartu
